# Supplementary material for: A conceptual model for glacial lake bathymetric distribution
Source: Copernicus journal article supplement (doi:10.5194/tc-17-5137-2023), 2023-12-06
Supplement: Supplementary file 1 [file tc-17-5137-2023-supplement.zip]

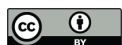

## *Supplement of*

# **A conceptual model for glacial lake bathymetric distribution**

**Taigang Zhang et al.**

*Correspondence to:* Taigang Zhang (zhangtg16@lzu.edu.cn) and Weicai Wang (weicaiwang@itpcas.ac.cn)

- tc-17-5137-2023-supplement-title-page.pdf
- Supplementary material1.xlsx
- Supplementary material2.docx

The copyright of individual parts of the supplement might differ from the article licence.
