# Supplementary material for: A conceptual model for glacial lake bathymetric distribution
Source: Copernicus journal article supplement (doi:10.5194/tc-17-5137-2023), 2023-12-06
Supplement: Supplementary file 2 [file tc-17-5137-2023-supplement.zip]

Archive with 3 entries (3 files):
- Supplementary material1.xlsx
- Supplementary material2.docx
- tc-17-5137-2023-supplement-title-page.pdf
