# Supplementary material for: A conceptual model for glacial lake bathymetric distribution
Source: Copernicus journal article supplement (doi:10.5194/tc-17-5137-2023), 2023-12-06
Supplement: Supplementary file 2 [file tc-17-5137-2023-supplement.zip › Supplementary material1.xlsx]

## Sheet: proglacial
ID	Name	Mountain	Country	Type1	Type2	Long	Lat	Survey time	Area/km2	Volume/m6	Max Depth	Source
1	Adygine Lake3	Tian Shan	Kyrgyzstan	Moraine-dammed	proglacier lake	74°26'27 E	42°30'34 N	2017	0.016	0.106	14	Falatkova et al., 2017
2	Midui Lake/Ganxico	Nyainqentanglha	China	Moraine-dammed	proglacier lake	96°30'6 E	29°27'52 N	2010	0.22	1.13	14	Yang et al., 2012
3	Chamlang South Tsho	Central Himalaya	Nepal	Moraine-dammed	proglacier lake	86°57'28 E	27°45'14 N	2009	0.87	35.6	87	Sawagaki et al., 2012
4	Gelhaipuco	Central Himalaya	China	Moraine-dammed	proglacier lake	87°48'49 E	27°57'52 N		0.58	25.5		Xu and Feng, 1994
5	Longbasaba lake	Central Himalaya	China	Moraine-dammed	proglacier lake	88° 4'37 E	27°56'37 N	2009	1.22	64	102	Yao et al., 2012
6	Pida Lake	Central Himalaya	China	Moraine-dammed	proglacier lake	88° 3'45 E	27°55'59 N	2005	0.97	50.44		Wang et al., 2008
7	Imja lake	Central Himalaya	Nepal	Moraine-dammed	proglacier lake	86°55'34 E	27°53'51 N	1992	0.64	28	99	Yamada and Sharma, 1993
8	Imja lake	Central Himalaya	Nepal	Moraine-dammed	proglacier lake	86°55'34 E	27°53'51 N	2002	0.86	35.8	91	Sakai et al., 2003
9	Imja lake	Central Himalaya	Nepal	Moraine-dammed	proglacier lake	86°55'34 E	27°53'51 N	2009	1.01	35.5	97	ICIMOD 2011
10	Imja lake	Central Himalaya	Nepal	Moraine-dammed	proglacier lake	86°55'34 E	27°53'51 N	2012	1.21	63.8		Somos-Valenzuela et al., 2014
11	Imja lake	Central Himalaya	Nepal	Moraine-dammed	proglacier lake	86°55'35 E	27°53'52 N	2014	1.28	78.4	150	Haritashya et al., 2018
12	Rolpa Tsho	Central Himalaya	Nepal	Moraine-dammed	proglacier lake	86°28'37 E	27°51'40 N	1994	1.39	76.6	131	Mool et al., 2001
13	Rolpa Tsho	Central Himalaya	Nepal	Moraine-dammed	proglacier lake	86°28'37 E	27°51'40 N	2002	1.76	97.7		Shrestha et al., 2004
14	Rolpa Tsho	Central Himalaya	Nepal	Moraine-dammed	proglacier lake	86°28'37 E	27°51'40 N	2009	1.54	85.9	134	ICIMOD 2011
15	Thulagi lake	Central Himalaya	Nepal	Moraine-dammed	proglacier lake	84°29'6 E	28°29'22 N	1995	0.76	31.8	81	Mool et al., 1995
16	Thulagi lake	Central Himalaya	Nepal	Moraine-dammed	proglacier lake	84°29'6 E	28°29'22 N	2009	0.94	35.4	80	ICIMOD 2011
17	Thulagi lake	Central Himalaya	Nepal	Moraine-dammed	proglacier lake	84°29'7 E	28°29'23 N	2017	0.9	36.1	76	Haritashya et al., 2018
18	Abmachimaico	Central Himalaya	China	Moraine-dammed	proglacier lake	87°38'21 E	28° 5'36 N	1987	0.56	19	72	LIGG/WECS/NEA (1988)；Sakai et al. 2012
19	Qangzonkco	Central Himalaya	China	Moraine-dammed	proglacier lake	87°46'25 E	27°55'29 N	1987	0.76	21.4	68	LIGG/WECS/NEA (1988)；Sakai et al. 2012
20	Lower Barun	Central Himalaya	Nepal	Moraine-dammed	proglacier lake	87° 5'30 E	27°47'49 N	1993	0.6	28	109	Yamada, 1998; Sakai et al. 2012
21	Lower Barun	Central Himalaya	Nepal	Moraine-dammed	proglacier lake	87° 5'31 E	27°47'50 N	2015	1.8	112.3		Haritashya et al., 2018
22	South Lhonak lake	Eastern Himalaya	India	Moraine-dammed	proglacier lake	88°11'43 E	27°54'46 N	2016	1.31	65.8	131	Sharma et al., 2018
23	Raphsthren	Eastern Himalaya	Bhutan	Moraine-dammed	proglacier lake	90°14'44 E	28° 6'15 N	1986	1.38	66.83	88	Geological survey of India, 1995; Sakai et al. 2012
24	Luggye	Eastern Himalaya	Bhutan	Moraine-dammed	proglacier lake	90°17'45 E	28° 5'36 N	2002	1.17	58.3	126	Yamada et al., 2004; Sakai et al. 2012
25	Arhuaycocha	Cordillera Blanca	Peru	Moraine-dammed	proglacier lake	77°37'36 W	8°53'16 S	2011	0.41	19.55	98	Muñoz et al., 2020
26	Cancahua	Cordillera Blanca	Peru	Moraine-dammed	proglacier lake	77°32'47 W	9° 5'37 S	2015	0.1	1.77	39	Muñoz et al., 2020
27	Lapa Lake	Caucasus	Russia	Moraine-dammed	proglacier lake	42°43'2 E	43°12'37 N	2001	0.017	0.062		Petrokov et al., 2012
28	Lapa Lake	Caucasus	Russia	Moraine-dammed	proglacier lake	42°43'2 E	43°12'37 N	2003	0.022	0.093		Petrokov et al., 2012
29	Lapa Lake	Caucasus	Russia	Moraine-dammed	proglacier lake	42°43'2 E	43°12'37 N	2006	0.028	0.143		Petrokov et al., 2012
30	Lapa Lake	Caucasus	Russia	Moraine-dammed	proglacier lake	42°43'2 E	43°12'37 N	2010	0.04	0.2	25	Petrokov et al., 2012
31	Mizinchik Lake	Caucasus	Russia	Moraine-dammed	proglacier lake	42°42'57 E	43°12'35 N	2001	0.006	0.03		Petrokov et al., 2012
32	Briksdalsbreen	Scandi Lovia	Norway	Moraine-dammed	proglacier lake	6°51'43 E	61°39'49 N	1979	0.047	0.314	20	Duck and McManus, 1985
33	Briksdalsbreen	Scandi Lovia	Norway	Moraine-dammed	proglacier lake	6°51'43 E	61°39'49 N	1982	0.045	0.282	20	Duck and McManus, 1985
34	Maud Lake	Southern Alps	New Zealand	Moraine-dammed	proglacier lake	170°29'56 E	43°28'41 S	1994	1.26	78	97	Warren and Kirkbride, 1998
35	Godley	Southern Alps	New Zealand	Moraine-dammed	proglacier lake	170°31'43 E	43°27'22 S	1994	1.65	102	99	Warren and Kirkbride, 1998
36	Hooker	Southern Alps	New Zealand	Moraine-dammed	proglacier lake	170° 6'28 E	43°40'46 S	1995	0.74	41	136	Warren and Kirkbride, 1998
37	Hooker	Southern Alps	New Zealand	Moraine-dammed	proglacier lake	170° 6'28 E	43°40'46 S	2009	1.22	50	140	Robertson et al. 2012
38	Mueller	Southern Alps	New Zealand	Moraine-dammed	proglacier lake	170° 5'17 E	43°42'22 S	2009	0.87	20	83	Robertson et al. 2012
39	Tasman	Southern Alps	New Zealand	Moraine-dammed	proglacier lake	170°10'53 E	43°41'9 S	1993	1.95	139	140	Hochstein et al., 1995
40	Ivory	Southern Alps	New Zealand	Moraine-dammed	proglacier lake	170°54'50 E	43° 7'47 S	1976	0.073	1.45	40	Hicks et al., 1990
41	Ivory	Southern Alps	New Zealand	Moraine-dammed	proglacier lake	170°54'50 E	43° 7'47 S	1980	0.1	2.02	35	Hicks et al., 1990
42	Ivory	Southern Alps	New Zealand	Moraine-dammed	proglacier lake	170°54'50 E	43° 7'47 S	1986	0.12	3.52	55	Hicks et al., 1990
43	East Bend Lake	Three Sisters	America	Moraine-dammed	proglacier lake	121°41'14 W	44° 4'52 N	1988	0.03	0.2	20	O'Connor et al., 2001
44	Thayer Lake	Three Sisters	America	Moraine-dammed	proglacier lake	121°45'37 W	44° 9'48 N	1991	0.04	0.36	20	O'Connor et al., 2001
45	Jack Lake	Jefferson Wilderness	America	Moraine-dammed	proglacier lake	121°50'19 W	44°29'1 N	1993	0.006	0.0265	5	O'Connor et al., 2001
46	Collier Lake	Three Sisters	America	Moraine-dammed	proglacier lake	121°47'23 W	44°11'4 N	1991	0.1	0.7	10	O'Connor et al., 2001
47	Carver Lake	Three Sisters	America	Moraine-dammed	proglacier lake	121°45'17 W	44° 6'52 N	1986	0.07	0.9	33	O'Connor et al., 2001
48	Chambers Lake 1	Three Sisters	America	Moraine-dammed	proglacier lake	121°45'41 W	44° 7'31 N	1991	0.026	0.26	15	O'Connor et al., 2001
49	Chambers Lake 2	Three Sisters	America	Moraine-dammed	proglacier lake	121°45'32 W	44° 7'28 N	1991	0.009	0.07	10	O'Connor et al., 2001
50	Vitus Lake	Alaska	America	Moraine-dammed	proglacier lake	143°26'58 W	60° 7'39 N	1995	58.4	2600		Josberger et al., 2006
51	Vitus Lake	Alaska	America	Moraine-dammed	proglacier lake	143°26'59 W	60° 7'40 N	1999	80.6	4400		Josberger et al., 2006
52	Vitus Lake	Alaska	America	Moraine-dammed	proglacier lake	143°26'60 W	60° 7'41 N	2000	89	4900		Josberger et al., 2006
53	Vitus Lake	Alaska	America	Moraine-dammed	proglacier lake	143°26'61 W	60° 7'42 N	2001	96.2	5400		Josberger et al., 2006
54	Vitus Lake	Alaska	America	Moraine-dammed	proglacier lake	143°26'62 W	60° 7'43 N	2002	105.8	6200		Josberger et al., 2006
55	Vitus Lake	Alaska	America	Moraine-dammed	proglacier lake	143°26'63 W	60° 7'44 N	2003	108.8	6400		Josberger et al., 2006
56	Vitus Lake	Alaska	America	Moraine-dammed	proglacier lake	143°26'64 W	60° 7'45 N	2004	114	6900	220	Josberger et al., 2006
57	Malaspina Lake	Alaska	America	Moraine-dammed	proglacier lake	140° 8'55 W	59°49'11 N		73.243	2012.29	50	Gustavson, 1975
58	Leones	North Patagonia	Chile	Moraine-dammed	proglacier lake	73° 9'59 W	46°44'52 S	2001	19.5	2454	350	Harrison et al., 2008), Loriaux and Casassa, 2013
59	Nef	North Patagonia	Chile	Moraine-dammed	proglacier lake	73°12'28 W	47° 5'38 S	1998	5.133	770.71	307	Loriaux & Casassa, 2013, Warren et al., 2001
60	Tasman	Southern Alps	New Zealand	Moraine-dammed	proglacier lake	170°10'53 E	43°41'9 S	2008	5.96	510	260	Dykes et al., 2011

## Sheet: periglacial
ID	Name	Mountain	Country	Type1	Type2	Long	Lat	Survey time	Area/km2	Volume/m6	Max Depth	Source
1	Nevadas Aguja	Cordillera Blanca	Peru	Moraine-dammed	periglacier lake	77°41'34 W	8°59'20 S	2011	0.03	0.25	19	Muñoz et al., 2020
2	Artesoncocha	Cordillera Blanca	Peru	Moraine-dammed	periglacier lake	77°38'39 W	8°58'29 S	2010	0.07	0.64	17	Muñoz et al., 2020
3	Artesa	Cordillera Blanca	Peru	Moraine-dammed	periglacier lake	77°30'53 W	9° 6'49 S	2005	0.02	0.12	10	Muñoz et al., 2020
4	Cochca	Cordillera Blanca	Peru	Moraine-dammed	periglacier lake	77°32'41 W	9°13'2 S	2007	0.07	1	27	Muñoz et al., 2020
5	Ishinca	Cordillera Blanca	Peru	Moraine-dammed	periglacier lake	77°24'56 W	9°23'25 S	1905	0.09	0.78	24.7	Muñoz et al., 2020
6	Ocshapalca	Cordillera Blanca	Peru	Moraine-dammed	periglacier lake	77°25'48 W	9°23'27 S	2006	0.03	0.43	40	Muñoz et al., 2020
7	Llaca	Cordillera Blanca	Peru	Moraine-dammed	periglacier lake	77°26'39 W	9°26'12 S	2012	0.06	0.49	19.2	Muñoz et al., 2020
8	Raria 2	Cordillera Blanca	Peru	Rock/Landslide-dammed	periglacier lake	77°13'12 W	9°49'41 S	2014	0.07	1.05	40.3	Muñoz et al., 2020
9	Macar	Cordillera Blanca	Peru	Moraine-dammed	periglacier lake	77°11'44 W	9°56'36 S	2007	0.08	0.705	24	Muñoz et al., 2020
10	Cancaraca Chico	Cordillera Blanca	Peru	Rock/Landslide-dammed	periglacier lake	77°30'17 W	9° 8'17 S	2011	0.05	0.28	11	Muñoz et al., 2020
11	Carhuanca	Cordillera Blanca	Peru	Moraine-dammed	periglacier lake	77°27'32 W	9° 7'17S	2009	0.08	1.49	45	Muñoz et al., 2020
12	Ishcaycocha Baja	Cordillera Blanca	Peru	Rock/Landslide-dammed	periglacier lake	77°17'42 W	9°23'34 S	2014	0.02	0.025	5.9	Muñoz et al., 2020
13	Ishcaycocha Alta	Cordillera Blanca	Peru	Rock/Landslide-dammed	periglacier lake	77°17'52 W	9°23'40 S	2016	0.08	1.2	30	Muñoz et al., 2020
14	Puntacuerno	Cordillera Blanca	Peru	Rock/Landslide-dammed	periglacier lake	77°17'45 W	9°23'1 S	2014	0.03	0.24	16.6	Muñoz et al., 2020
15	Tumagarañon	Cordillera Blanca	Peru	Moraine-dammed	periglacier lake	77°18'4 W	9°29'1 S	2009	0.06	1.18	34	Muñoz et al., 2020
16	Maparaju Bajo	Cordillera Blanca	Peru	Moraine-dammed	periglacier lake	77°18'7 W	9°28'16 S	2009	0.08	1.35	30	Muñoz et al., 2020
17	Chukhung	Central Himalaya	Nepal	Moraine-dammed	periglacier lake	86°53'14 E	27°53'24 N	<2014	0.0652	0.55	24	Westoby et al., 2014
18	Langmale Lake	Central Himalaya	Nepal	Moraine-dammed	periglacier lake	87° 8'22 E	27°48'47 N	2017	0.083	1.1	13.29	Byers et al., 2019
19	Adygine Lake1	Tian Shan	Kyrgyzstan	Moraine-dammed	periglacier lake	74°26'29 E	42°30'52 N	2008	0.0034	0.006	4.4	Jansky´ et al., 2010
20	Adygine Lake2	Tian Shan	Kyrgyzstan	Moraine-dammed	periglacier lake	74°26'11 E	42°30'42 N	2008	0.032	0.205	22.2	Jansky´ et al., 2010
21	Huandoy	Cordillera Blanca	Peru	Moraine-dammed	periglacier lake	7°40'50 W	9° 0'59 S	2007	0.008	0.02	5	Muñoz et al., 2020
22	Beihuco	Central Himalaya	China	Moraine-dammed	periglacier lake	86° 9'37 E	28°18'8 N	1987	0.31	6	36	LIGG/WECS/NEA (1988)；Sakai et al. 2012
23	Ngozumpa 2	Central Himalaya	Nepal	Moraine-dammed	periglacier lake	86°41'23 E	27°57'2 N	2008	0.43	10.57	43	Sharma et al., 2012
24	Ngozumpa 3	Central Himalaya	Nepal	Moraine-dammed	periglacier lake	86°41'53 E	27°56'26 N	2008	0.185	3.3	33.3	Sharma et al., 2012
25	Koltor Lake	Tian Shan	Kyrgyzstan	Moraine-dammed	periglacier lake	74°47'40 E	42°28'40 N	2008	0.22	1.83	14.8	Jansky´ et al., 2010
26	Dig Tsho	Central Himalaya	Nepal	Moraine-dammed	periglacier lake	86°35'7 E	27°52'28 N		0.5	10		Mool et al., 2001
27	Jialongcuo	Central Himalaya	China	Moraine-dammed	periglacier lake	85°50'50 E	28°12'40 N	2020	0.6	37.5	134	Li et al., 2021
28	Tam Pokhari	Central Himalaya	Nepal	Moraine-dammed	periglacier lake	86°50'40 E	27°44'30 N		0.47	21.25		Mool et al., 2001
29	Cirenmaco	Central Himalaya	China	Moraine-dammed	periglacier lake	86° 3'57 E	28° 4'1 N	2012	0.39	18	115	Wang et al., 2018
30	Safuna Baja	Cordillera Blanca	Peru	Moraine-dammed	periglacier lake	77°37'26 W	8°50'6 S	2010	0.15	0.69	13	Muñoz et al., 2020
31	Safuna Alta	Cordillera Blanca	Peru	Moraine-dammed	periglacier lake	77°37'5 W	8°50'33 S	2010	0.33	15.52	84	Muñoz et al., 2020
32	Pucacocha	Cordillera Blanca	Peru	Moraine-dammed	periglacier lake	77°37'49 W	8°51'32 S	2006	0.28	8.46	78.5	Muñoz et al., 2020
33	Jancarurish	Cordillera Blanca	Peru	Moraine-dammed	periglacier lake	77°40'22 W	8°51'29 S	2011	0.32	12.32	88	Muñoz et al., 2020
34	Quitacocha	Cordillera Blanca	Peru	Moraine-dammed	periglacier lake	77°41'6 W	8°52'50 S	2011	0.13	3.23	57	Muñoz et al., 2020
35	Yuraccocha	Cordillera Blanca	Peru	Moraine-dammed	periglacier lake	77°43'48 W	8°53'1 S	2011	0.29	8.18	55	Muñoz et al., 2020
36	Taullicocha	Cordillera Blanca	Peru	Moraine-dammed	periglacier lake	77°35'13 W	8°54'18 S	2007	0.13	2.43	37	Muñoz et al., 2020
37	Artizon Alto	Cordillera Blanca	Peru	Moraine-dammed	periglacier lake	77°36'59 W	8°56'30 S	2011	0.14	1.42	25	Muñoz et al., 2020
38	Laguna 69	Cordillera Blanca	Peru	Moraine-dammed	periglacier lake	77°36'42 W	9° 0'38 S	2009	0.1	2.76	58	Muñoz et al., 2020
39	Huallcacocha	Cordillera Blanca	Peru	Moraine-dammed	periglacier lake	77°32'38 W	9° 9'43 S	2014	0.17	5.25	75.2	Muñoz et al., 2020
40	Auquiscocha	Cordillera Blanca	Peru	Rock/Landslide-dammed	periglacier lake	77°33'28 W	9°11'42 S	2008	0.77	49.63	94	Muñoz et al., 2020
41	Checquiacocha	Cordillera Blanca	Peru	Moraine-dammed	periglacier lake	77°32'43 W	9°11'5 S	2008	0.35	12.85	81	Muñoz et al., 2020
42	513	Cordillera Blanca	Peru	Rock/Landslide-dammed	periglacier lake	77°33'0 W	9°12'45 S	2011	0.21	9.25	83	Muñoz et al., 2020
43	Lejiacocha	Cordillera Blanca	Peru	Moraine-dammed	periglacier lake	77°30'16 W	9°17'10 S	2005	0.18	1.36	19.9	Muñoz et al., 2020
44	Akillpo	Cordillera Blanca	Peru	Moraine-dammed	periglacier lake	77°25'14 W	9°20'33 S	2012	0.41	4.61	32.4	Muñoz et al., 2020
45	Paccharuri	Cordillera Blanca	Peru	Moraine-dammed	periglacier lake	77°27'7 W	9°16'53 S	2005	0.27	7.13	50	Muñoz et al., 2020
46	Esparta	Cordillera Blanca	Peru	Moraine-dammed	periglacier lake	77°24'25 W	9°18'55 S	2010	0.1	1.19	22	Muñoz et al., 2020
47	Pacliashcocha	Cordillera Blanca	Peru	Rock/Landslide-dammed	periglacier lake	77°22'17 W	9°20'24 S	2010	0.22	2.45	26	Muñoz et al., 2020
48	Pucaranracocha	Cordillera Blanca	Peru	Moraine-dammed	periglacier lake	77°20'54 W	9°20'39 S	2007	0.23	4.24	47	Muñoz et al., 2020
49	Milluacocha	Cordillera Blanca	Peru	Moraine-dammed	periglacier lake	77°24'45 W	9°21'49 S	2011	0.19	3.98	42	Muñoz et al., 2020
50	Mullaca	Cordillera Blanca	Peru	Moraine-dammed	periglacier lake	77°28'34 W	9°25'51 S	2006	0.11	2.04	38	Muñoz et al., 2020
51	Palcacocha	Cordillera Blanca	Peru	Moraine-dammed	periglacier lake	77°22'44 W	9°23'42 S	2009	0.52	17.32	73	Muñoz et al., 2020
52	Shallap	Cordillera Blanca	Peru	Moraine-dammed	periglacier lake	77°21'25 W	9°29'33 S	2004	0.16	3.47	36.6	Muñoz et al., 2020
53	Cuchillacocha	Cordillera Blanca	Peru	Moraine-dammed	periglacier lake	77°21'14 W	9°24'37 S	2005	0.14	2.14	27	Muñoz et al., 2020
54	Tullparaju	Cordillera Blanca	Peru	Moraine-dammed	periglacier lake	77°20'28 W	9°25'8 S	2011	0.46	12.47	63	Muñoz et al., 2020
55	Rajucolta	Cordillera Blanca	Peru	Moraine-dammed	periglacier lake	77°20'35 W	9°31'21 S	2004	0.51	17.55	72.7	Muñoz et al., 2020
56	Tararhua	Cordillera Blanca	Peru	Moraine-dammed	periglacier lake	77°19'32 W	9°34'2 S	2008	0.36	4.24	31	Muñoz et al., 2020
57	Pamparaju	Cordillera Blanca	Peru	Rock/Landslide-dammed	periglacier lake	77°15'32 W	9°47'49 S	2010	0.19	1.64	21	Muñoz et al., 2020
58	Pag-Pag	Cordillera Blanca	Peru	Moraine-dammed	periglacier lake	77°33'21 W	9° 4'6 S	2012	0.1	0.8	18.9	Muñoz et al., 2020
59	Tintacocha 2	Cordillera Blanca	Peru	Rock/Landslide-dammed	periglacier lake	77°34'52 W	8°58'48 S	2009	0.19	5.07	43.7	Muñoz et al., 2020
60	Allicocha	Cordillera Blanca	Peru	Rock/Landslide-dammed	periglacier lake	77°27'34 W	9°15'3 S	2006	0.36	5.72	33	Muñoz et al., 2020
61	Cancaraca Grande	Cordillera Blanca	Peru	Moraine-dammed	periglacier lake	77°30'22 W	9° 8'30 S	2011	0.1	2.03	47	Muñoz et al., 2020
62	Yanaraju	Cordillera Blanca	Peru	Moraine-dammed	periglacier lake	77°29'1 W	9° 7'58 S	2005	0.23	7.64	61	Muñoz et al., 2020
63	Rurichinchey 1	Cordillera Blanca	Peru	Rock/Landslide-dammed	periglacier lake	77°19'1 W	9°20'30 S	2012	0.12	0.56	5.2	Muñoz et al., 2020
64	Tumarina	Cordillera Blanca	Peru	Moraine-dammed	periglacier lake	77°17'46 W	9°29'40 S	2009	0.11	0.32	10	Muñoz et al., 2020
65	Japracocha	Cordillera Blanca	Peru	Rock/Landslide-dammed	periglacier lake	77° 9'51 W	9°49'7 S	2007	0.16	2.9	41	Muñoz et al., 2020
66	Amphulachare	Central Himalaya	Nepal	Moraine-dammed	periglacier lake	86°54'50 E	27°53'36 N	2014	0.12	3.2	66	Haritashya et al., 2018

## Sheet: extraglacial
ID	Name	Mountain	Country	Type1	Type2	Long	Lat	Survey time	Area/km2	Volume/m6	Max Depth	Source
1	Blanca 1	Cordillera Blanca	Peru	Rock/Landslide-dammed	extraglacier lake	77°52'44 W	8°23'15 S	2009	0.084	1.46	36	Muñoz et al., 2020
2	Quinual	Cordillera Blanca	Peru	Rock/Landslide-dammed	extraglacier lake	77°53'29 W	8°24'5 S	2009	0.11	1.8	29	Muñoz et al., 2020
3	Piticocha	Cordillera Blanca	Peru	Rock/Landslide-dammed	extraglacier lake	77°54'57 W	8°25'58 S	2010	0.92	12.84	46	Muñoz et al., 2020
4	Pachorgo Bajo	Cordillera Blanca	Peru	Rock/Landslide-dammed	extraglacier lake	77°56'20 W	8°25'56 S	2010	0.43	2	9	Muñoz et al., 2020
5	Pachorgo Alto	Cordillera Blanca	Peru	Rock/Landslide-dammed	extraglacier lake	77°55'46 W	8°26'9 S	2010	0.25	0.45	5	Muñoz et al., 2020
6	Pusaccocha 1	Cordillera Blanca	Peru	Rock/Landslide-dammed	extraglacier lake	77°54'49 W	8°21'52 S	2008	0.12	1.86	28	Muñoz et al., 2020
7	Pusaccocha 2	Cordillera Blanca	Peru	Rock/Landslide-dammed	extraglacier lake	77°54'26 W	8°21'48 S	2008	0.29	4.41	36	Muñoz et al., 2020
8	Pusaccocha 3	Cordillera Blanca	Peru	Rock/Landslide-dammed	extraglacier lake	77°53'58 W	8°21'44 S	2008	0.09	0.84	28	Muñoz et al., 2020
9	Pusaccocha 4	Cordillera Blanca	Peru	Rock/Landslide-dammed	extraglacier lake	77°53'43 W	8°21'41 S	2008	0.06	0.81	29	Muñoz et al., 2020
10	Pusaccocha 5	Cordillera Blanca	Peru	Rock/Landslide-dammed	extraglacier lake	77°53'30 W	8°21'35 S	2008	0.06	0.6	21	Muñoz et al., 2020
11	Pelagatos	Cordillera Blanca	Peru	Rock/Landslide-dammed	extraglacier lake	77°47'40 W	8°10'44 S	2009	1.8	111.39		Muñoz et al., 2020
12	Llamacocha	Cordillera Blanca	Peru	Rock/Landslide-dammed	extraglacier lake	77°49'15 W	8°15'20 S	2013	0.004	0.28	11	Muñoz et al., 2020
13	Challhuacocha	Cordillera Blanca	Peru	Rock/Landslide-dammed	extraglacier lake	77°45'34 W	8°14'8 S	2013	0.46	9.14	32	Muñoz et al., 2020
14	Lechecocha	Cordillera Blanca	Peru	Rock/Landslide-dammed	extraglacier lake	77°45'5 W	8°12'51 S	2013	0.06	0.14	5.5	Muñoz et al., 2020
15	Labrascocha	Cordillera Blanca	Peru	Rock/Landslide-dammed	extraglacier lake	77°45'1 W	8°14'44 S	2013	0.47	7.1	30.7	Muñoz et al., 2020
16	Racaynaca	Cordillera Blanca	Peru	Rock/Landslide-dammed	extraglacier lake	77°53'19 W	8°18'30 S	2013	0.11	1.62	33.2	Muñoz et al., 2020
17	Quinuacocha	Cordillera Blanca	Peru	Rock/Landslide-dammed	extraglacier lake	77°52'8 W	8°19'47 S	2013	0.38	4.06	28.8	Muñoz et al., 2020
18	Pariacocha 3	Cordillera Blanca	Peru	Rock/Landslide-dammed	extraglacier lake	77°53'1 W	8°19'16 S	2013	0.002	0.14	10.8	Muñoz et al., 2020
19	Oscura	Cordillera Blanca	Peru	Rock/Landslide-dammed	extraglacier lake	77°50'16 W	8°21'54 S	2013	0.13	1.41	25.2	Muñoz et al., 2020
20	Azulcocha	Cordillera Blanca	Peru	Rock/Landslide-dammed	extraglacier lake	77°50'17 W	8°23'0 S	2013	0.15	1.18	17.1	Muñoz et al., 2020
21	Surcocha	Cordillera Blanca	Peru	Rock/Landslide-dammed	extraglacier lake	77°50'29 W	8°23'23 S	2013	0.18	4.33	51.7	Muñoz et al., 2020
22	Rusgo	Cordillera Blanca	Peru	Rock/Landslide-dammed	extraglacier lake	77°51'2 W	8°23'45 S	2013	0.17	6.83		Muñoz et al., 2020
23	Contotora	Cordillera Blanca	Peru	Rock/Landslide-dammed	extraglacier lake	77°50'51 W	8°22'1 S	2013	0.06	0.04	2.5	Muñoz et al., 2020
24	Nieve	Cordillera Blanca	Peru	Rock/Landslide-dammed	extraglacier lake	77°51'24 W	8°22'11 S	2013	0.21	3.28	41.1	Muñoz et al., 2020
25	Huinchas	Cordillera Blanca	Peru	Rock/Landslide-dammed	extraglacier lake	77°51'3 W	8°26'46 S	2012	0.25	5.32	34.6	Muñoz et al., 2020
26	Rutu	Cordillera Blanca	Peru	Rock/Landslide-dammed	extraglacier lake	77°51'18 W	8°25'57 S	2012	0.76	28.29	86.1	Muñoz et al., 2020
27	Sarca 1	Cordillera Blanca	Peru	Rock/Landslide-dammed	extraglacier lake	77°51'23 W	8°25'12 S	2012	0.28	8.42	56.3	Muñoz et al., 2020
28	Coyllorcocha baja	Cordillera Blanca	Peru	Rock/Landslide-dammed	extraglacier lake	77°49'18 W	8°40'2 S	2015	0.51	17.21	49.3	Muñoz et al., 2020
29	Coyllorcocha alta	Cordillera Blanca	Peru	Rock/Landslide-dammed	extraglacier lake	77°48'36 W	8°39'42 S	2015	0.26	3.57	27.2	Muñoz et al., 2020
30	Tutapac	Cordillera Blanca	Peru	Rock/Landslide-dammed	extraglacier lake	77°47'2 W	8°40'2 S	2015	0.03	0.2	16.5	Muñoz et al., 2020
31	Jatuncocha	Cordillera Blanca	Peru	Rock/Landslide-dammed	extraglacier lake	77°39'30 W	8°55'42 S	2007	0.48	9.23	34	Muñoz et al., 2020
32	Artizon Bajo	Cordillera Blanca	Peru	Moraine-dammed	extraglacier lake	77°36'54 W	8°56'5 S	2011	0.03	0.36	23	Muñoz et al., 2020
33	Parón	Cordillera Blanca	Peru	Moraine-dammed	extraglacier lake	77°40'18 W	8°59'37 S	2010	1.48	39.89	45	Muñoz et al., 2020
34	LLanganuco Bajo	Cordillera Blanca	Peru	Rock/Landslide-dammed	extraglacier lake	77°38'46 W	9° 4'30 S	2007	0.58	11.92	29	Muñoz et al., 2020
35	Llanganuco Alto	Cordillera Blanca	Peru	Rock/Landslide-dammed	extraglacier lake	77°37'40 W	9° 3'40 S	2007	0.68	2.04	10	Muñoz et al., 2020
36	Rajupaquinan	Cordillera Blanca	Peru	Rock/Landslide-dammed	extraglacier lake	77°33'14 W	9°13'20 S	2007	0.03	0.46	27	Muñoz et al., 2020
37	Janya Baja	Cordillera Blanca	Peru	Rock/Landslide-dammed	extraglacier lake	77°28'30 W	9°23'50 S	2007	0.1	1.2	22	Muñoz et al., 2020
38	Janya Alta	Cordillera Blanca	Peru	Rock/Landslide-dammed	extraglacier lake	77°28'0 W	9°23'35 S	2007	0.06	0.23	7	Muñoz et al., 2020
39	Gueshguecocha	Cordillera Blanca	Peru	Rock/Landslide-dammed	extraglacier lake	77°18'35 W	9°49'31 S	2010	0.3	1.49	10	Muñoz et al., 2020
40	Jarpococha	Cordillera Blanca	Peru	Rock/Landslide-dammed	extraglacier lake	77°18'3 W	9°49'10 S	2010	0.12	0.32	6	Muñoz et al., 2020
41	Querococha	Cordillera Blanca	Peru	Rock/Landslide-dammed	extraglacier lake	77°19'35 W	9°43'2 S	2006	1.44	46.35	59	Muñoz et al., 2020
42	Raria 1	Cordillera Blanca	Peru	Rock/Landslide-dammed	extraglacier lake	77°13'25 W	9°49'25 S	2014	0.05	0.37	16.5	Muñoz et al., 2020
43	Yanacocha	Cordillera Blanca	Peru	Rock/Landslide-dammed	extraglacier lake	77°12'27 W	10° 2'32 S	2007	0.19	0.41	4	Muñoz et al., 2020
44	Huaycococha	Cordillera Blanca	Peru	Rock/Landslide-dammed	extraglacier lake	77°41'44 W	8°17'35 S	2013	0.11	1.23	20.3	Muñoz et al., 2020
45	Huascococha	Cordillera Blanca	Peru	Rock/Landslide-dammed	extraglacier lake	77°43'27 W	8°19'9 S	2012	0.24	7.27	50.7	Muñoz et al., 2020
46	Torococha	Cordillera Blanca	Peru	Rock/Landslide-dammed	extraglacier lake	77°43'12 W	8°18'52 S	2015	0.29	8.66	53.6	Muñoz et al., 2020
47	Huecrucocha	Cordillera Blanca	Peru	Rock/Landslide-dammed	extraglacier lake	77°31'8 W	8°55'35 S	2010	0.21	2.35	19	Muñoz et al., 2020
48	Orconcocha	Cordillera Blanca	Peru	Rock/Landslide-dammed	extraglacier lake	77°31'52 W	8°55'54 S	2010	0.13	2.36	32	Muñoz et al., 2020
49	Tintacocha 1	Cordillera Blanca	Peru	Rock/Landslide-dammed	extraglacier lake	77°34'27 W	8°58'30 S	2009	0.07	0.15	4.4	Muñoz et al., 2020
50	Tocllacocha Grande	Cordillera Blanca	Peru	Rock/Landslide-dammed	extraglacier lake	77°34'32 W	8°56'28 S	2012	0.2	5.71	56.3	Muñoz et al., 2020
51	Huishcash	Cordillera Blanca	Peru	Rock/Landslide-dammed	extraglacier lake	77°34'7 W	8°55'25 S	2012	0.14	0.46	7.2	Muñoz et al., 2020
52	Tocllacocha Chica	Cordillera Blanca	Peru	Rock/Landslide-dammed	extraglacier lake	77°34'29 W	8°55'45 S	2012	0.1	0.93	17.6	Muñoz et al., 2020
53	Mellajirca 2	Cordillera Blanca	Peru	Rock/Landslide-dammed	extraglacier lake	77°31'27 W	8°58'12 S	2009	0.01	0.07	12	Muñoz et al., 2020
54	Mellajirca 1	Cordillera Blanca	Peru	Rock/Landslide-dammed	extraglacier lake	77°31'50 W	8°57'54 S	2009	0.05	0.77	26	Muñoz et al., 2020
55	Mellajirca 3	Cordillera Blanca	Peru	Rock/Landslide-dammed	extraglacier lake	77°31'54 W	8°57'33 S	2009	0.005	0.017	8	Muñoz et al., 2020
56	Jatuntallancocha	Cordillera Blanca	Peru	Rock/Landslide-dammed	extraglacier lake	77°17'56 W	9°15'10 S	2008	0.21	2.91	25	Muñoz et al., 2020
57	Ventanilla	Cordillera Blanca	Peru	Rock/Landslide-dammed	extraglacier lake	77°17'9 W	9°15'24 S	2008	0.55	19.01	76	Muñoz et al., 2020
58	Pagarisha	Cordillera Blanca	Peru	Rock/Landslide-dammed	extraglacier lake	77°21'38 W	9°16'34 S	2008	0.19	3.87	18.5	Muñoz et al., 2020
59	Libron	Cordillera Blanca	Peru	Rock/Landslide-dammed	extraglacier lake	77°29'25 W	9°12'22 S	2007	0.55	20.99	68	Muñoz et al., 2020
60	Purhuay	Cordillera Blanca	Peru	Rock/Landslide-dammed	extraglacier lake	77°12'16 W	9°18'27 S	2013	0.84	48.2	57.1	Muñoz et al., 2020
61	Sacaracocha	Cordillera Blanca	Peru	Rock/Landslide-dammed	extraglacier lake	77°15'21 W	9°14'10 S	2013	0.23	5.76	61.1	Muñoz et al., 2020
62	Patococha	Cordillera Blanca	Peru	Rock/Landslide-dammed	extraglacier lake	77°15'37 W	9°13'40 S	2013	0.04	0.54	31.1	Muñoz et al., 2020
63	Huascacocha	Cordillera Blanca	Peru	Rock/Landslide-dammed	extraglacier lake	77°14'21 W	9°13'31 S	2013	0.25	3.73	27	Muñoz et al., 2020
64	Chalhuacocha	Cordillera Blanca	Peru	Rock/Landslide-dammed	extraglacier lake	77°17'19 W	9°22'5 S	2012	0.15	3.6	31.7	Muñoz et al., 2020
65	Ichicpotrero	Cordillera Blanca	Peru	Rock/Landslide-dammed	extraglacier lake	77°15'10 W	9°27'56 S	2015	0.14	2.89	33.1	Muñoz et al., 2020

## Sheet: supraglacial
ID	Name	Mountain	Country	Type1	Type2	Long	Lat	Survey time	Area/km2	Volume/m6	Max Depth	Source
1	Ngozumpa	Central Himalaya	Nepal	Ice-dammed	surpraglacier lake	86°41'59 E	27°57'12 N	1999	0.05	0.24	12	Benn et al., 2000; Sakai et al. 2012
2	Spillway Lake	Central Himalaya	Nepal	Ice-dammed	surpraglacier lake	86°42'45 E	27°56'25 N	2009	0.3	2.2	27	Thomson et al., 2012
3	Ripimo	Central Himalaya	Nepal	Ice-dammed	surpraglacier lake	86°28'15 E	27°53'22 N	1993	0.02	0.18	25	Sakai et al. 2012
4	Khumbu Glacier K1	Central Himalaya	Nepal	Ice-dammed	surpraglacier lake	86°48'35 E	27°55'57 N	2016	0.000943	0.001443	5.5	Watson et al., 2018
5	Khumbu Glacier K2	Central Himalaya	Nepal	Ice-dammed	surpraglacier lake	86°48'40 E	27°56'4 N	2016	0.002729	0.009049	9.9	Watson et al., 2018
6	Khumbu Glacier K4	Central Himalaya	Nepal	Ice-dammed	surpraglacier lake	86°48'47 E	27°56'1 N	2016	0.000958	0.00146	3.5	Watson et al., 2018
7	Khumbu Glacier K6	Central Himalaya	Nepal	Ice-dammed	surpraglacier lake	86°48'47 E	27°56'32 N	2016	0.00401	0.019042	9.1	Watson et al., 2018
8	Khumbu Glacier K7	Central Himalaya	Nepal	Ice-dammed	surpraglacier lake	86°48'55 E	27°56'35 N	2016	0.000255	0.000379	4.3	Watson et al., 2018
9	Khumbu Glacier K8	Central Himalaya	Nepal	Ice-dammed	surpraglacier lake	86°48'56 E	27°56'37 N	2016	0.00025	0.000445	4.4	Watson et al., 2018
10	Khumbu Glacier K9	Central Himalaya	Nepal	Ice-dammed	surpraglacier lake	86°49'1 E	27°56'35 N	2016	0.005422	0.026959	14.6	Watson et al., 2018
11	Khumbu Glacier K10	Central Himalaya	Nepal	Ice-dammed	surpraglacier lake	86°48'55 E	27°56'45 N	2016	0.000392	0.000752	4.5	Watson et al., 2018
12	Khumbu Glacier K11	Central Himalaya	Nepal	Ice-dammed	surpraglacier lake	86°49'7 E	27°56'45 N	2016	0.0006	0.000882	3.4	Watson et al., 2018
13	Khumbu Glacier K12	Central Himalaya	Nepal	Ice-dammed	surpraglacier lake	86°49'6 E	27°56'49 N	2016	0.003654	0.005746	6	Watson et al., 2018
14	Khumbu Glacier K14	Central Himalaya	Nepal	Ice-dammed	surpraglacier lake	86°49'6 E	27°56'52 N	2016	3.9e-05	2.4e-05	1.3	Watson et al., 2018
15	Khumbu Glacier K15	Central Himalaya	Nepal	Ice-dammed	surpraglacier lake	86°49'9 E	27°56'51 N	2016	0.000596	0.001087	4	Watson et al., 2018
16	Khumbu Glacier K16	Central Himalaya	Nepal	Ice-dammed	surpraglacier lake	86°49'1 E	27°56'55 N	2016	0.000625	0.001497	5.5	Watson et al., 2018
17	Khumbu Glacier K18	Central Himalaya	Nepal	Ice-dammed	surpraglacier lake	86°49'19 E	27°56'54 N	2016	0.006428	0.030058	13.5	Watson et al., 2018
18	Khumbu Glacier K19	Central Himalaya	Nepal	Ice-dammed	surpraglacier lake	86°49'10 E	27°56'59 N	2016	0.001193	0.002116	6.1	Watson et al., 2018
19	Khumbu Glacier K20	Central Himalaya	Nepal	Ice-dammed	surpraglacier lake	86°49'12 E	27°57'1 N	2016	0.003502	0.013369	8.8	Watson et al., 2018
20	Khumbu Glacier K21	Central Himalaya	Nepal	Ice-dammed	surpraglacier lake	86°49'20 E	27°57'2 N	2016	0.018744	0.290928		Watson et al., 2018
21	Khumbu Glacier K22	Central Himalaya	Nepal	Ice-dammed	surpraglacier lake	86°49'10 E	27°57'4 N	2016	0.000754	0.001634	4.5	Watson et al., 2018
22	Lobuche Glacier L1	Central Himalaya	Nepal	Ice-dammed	surpraglacier lake	86°48'43 E	27°57'11 N	2016	0.003789	0.016986	9.8	Watson et al., 2018
23	Lobuche Glacier L2	Central Himalaya	Nepal	Ice-dammed	surpraglacier lake	86°48'30 E	27°57'20 N	2016	0.000207	0.000235	3.1	Watson et al., 2018
24	Lobuche Glacier L3	Central Himalaya	Nepal	Ice-dammed	surpraglacier lake	86°48'30 E	27°57'20 N	2016	0.000318	0.000496	4.3	Watson et al., 2018
25	Lobuche Glacier L4	Central Himalaya	Nepal	Ice-dammed	surpraglacier lake	86°48'22 E	27°57'22 N	2016	0.013101	0.071514	17.1	Watson et al., 2018
26	Lobuche Glacier L5	Central Himalaya	Nepal	Ice-dammed	surpraglacier lake	86°48'29 E	27°57'27 N	2016	0.00153	0.002789	4	Watson et al., 2018
27	Changri Shar	Central Himalaya	Nepal	Ice-dammed	surpraglacier lake	86°48'52 E	27°59'4 N	2017	0.18	1.36	25	Miles et al., 2018

## Sheet: ice-dammed
ID	Name	Mountain	Country	Type1	Type2	Long	Lat	Survey time	Area/km2	Volume/m6	Max Depth	Source
1	Kyagar Lake	Karakoram	China	Ice-dammed	ice-dammed lake	77°10'56 E	35°40'28 N		0.89	16		Zhang and Zhao, 1990
2	Ape Lake	British Columbia	Canada	Ice-dammed	ice-dammed lake	126°10'33W	52° 5'46N	1985	2.77	92.7		Gilbert and Desloges, 1987
3	Bashkara Lake	Caucasus	Russia	Ice-dammed	ice-dammed lake	42°43'34 E	43°12'34 N	2005	0.065	0.74	34	Petrokov et al., 2007
4	Bashkara Lake	Caucasus	Russia	Ice-dammed	ice-dammed lake	42°43'34 E	43°12'34 N	2008	0.085	1	36	Petrokov et al., 2012
5	Chungurchat-Chiran glacier lake	Caucasus	Russia	Ice-dammed	ice-dammed lake	42°32'7 E	43°22'18 N	2006	0.089	0.55	17	Petrokov et al., 2007
6	Cachet II	North Patagonia	Chile	Ice-dammed	ice-dammed lake	73°15'25 W	47°11'24 S	2008	4.045	200		Casassa et al., 2010
7	Goddard Lake	British Columbia	Canada	Ice-dammed	ice-dammed lake	124°10'38 W	51° 5'46 N	1994	0.21	4	45	Clague and Evans, 1997
8	Hazard Creek	Yukon	Canada	Ice-dammed	ice-dammed lake	140°12'49 W	61°15'11 N	1974	0.88	14	100	Collins and Clarke, 1977
9	Hazard Creek	Yukon	Canada	Ice-dammed	ice-dammed lake	140°12'49 W	61°15'11 N	1978	1.274	19.62		Clarke, 1982
10	Hidden Creek	Alaska	America	Ice-dammed	ice-dammed lake	143° 5'35 W	61°33'38 N	2000	0.82	41.23	100	Cunico, 2003
11	MT Lake	British Columbia	Canada	Ice-dammed	ice-dammed lake	124°30'24 W	51°13'32 N	1982	0.042	0.5	25	Blown and Church, 1985
12	Tulsequah	British Columbia	Canada	Ice-dammed	ice-dammed lake	133°51'3 W	58°47'51 N	1958	3.86	229		Marcus, 1960
13	Miage lake	Alpes	Italy	Ice-dammed	ice-dammed lake	6°52'15 E	45°46'44 N	2003	0.036	0.34	25	Diolaiuti et al., 2005
