# Supplementary material for: A conceptual model for glacial lake bathymetric distribution
Source: Copernicus journal article supplement (doi:10.5194/tc-17-5137-2023), 2023-12-06
Supplement: Supplementary file 2 [file tc-17-5137-2023-supplement.zip › Supplementary material2.docx]

**Supplementary data3**


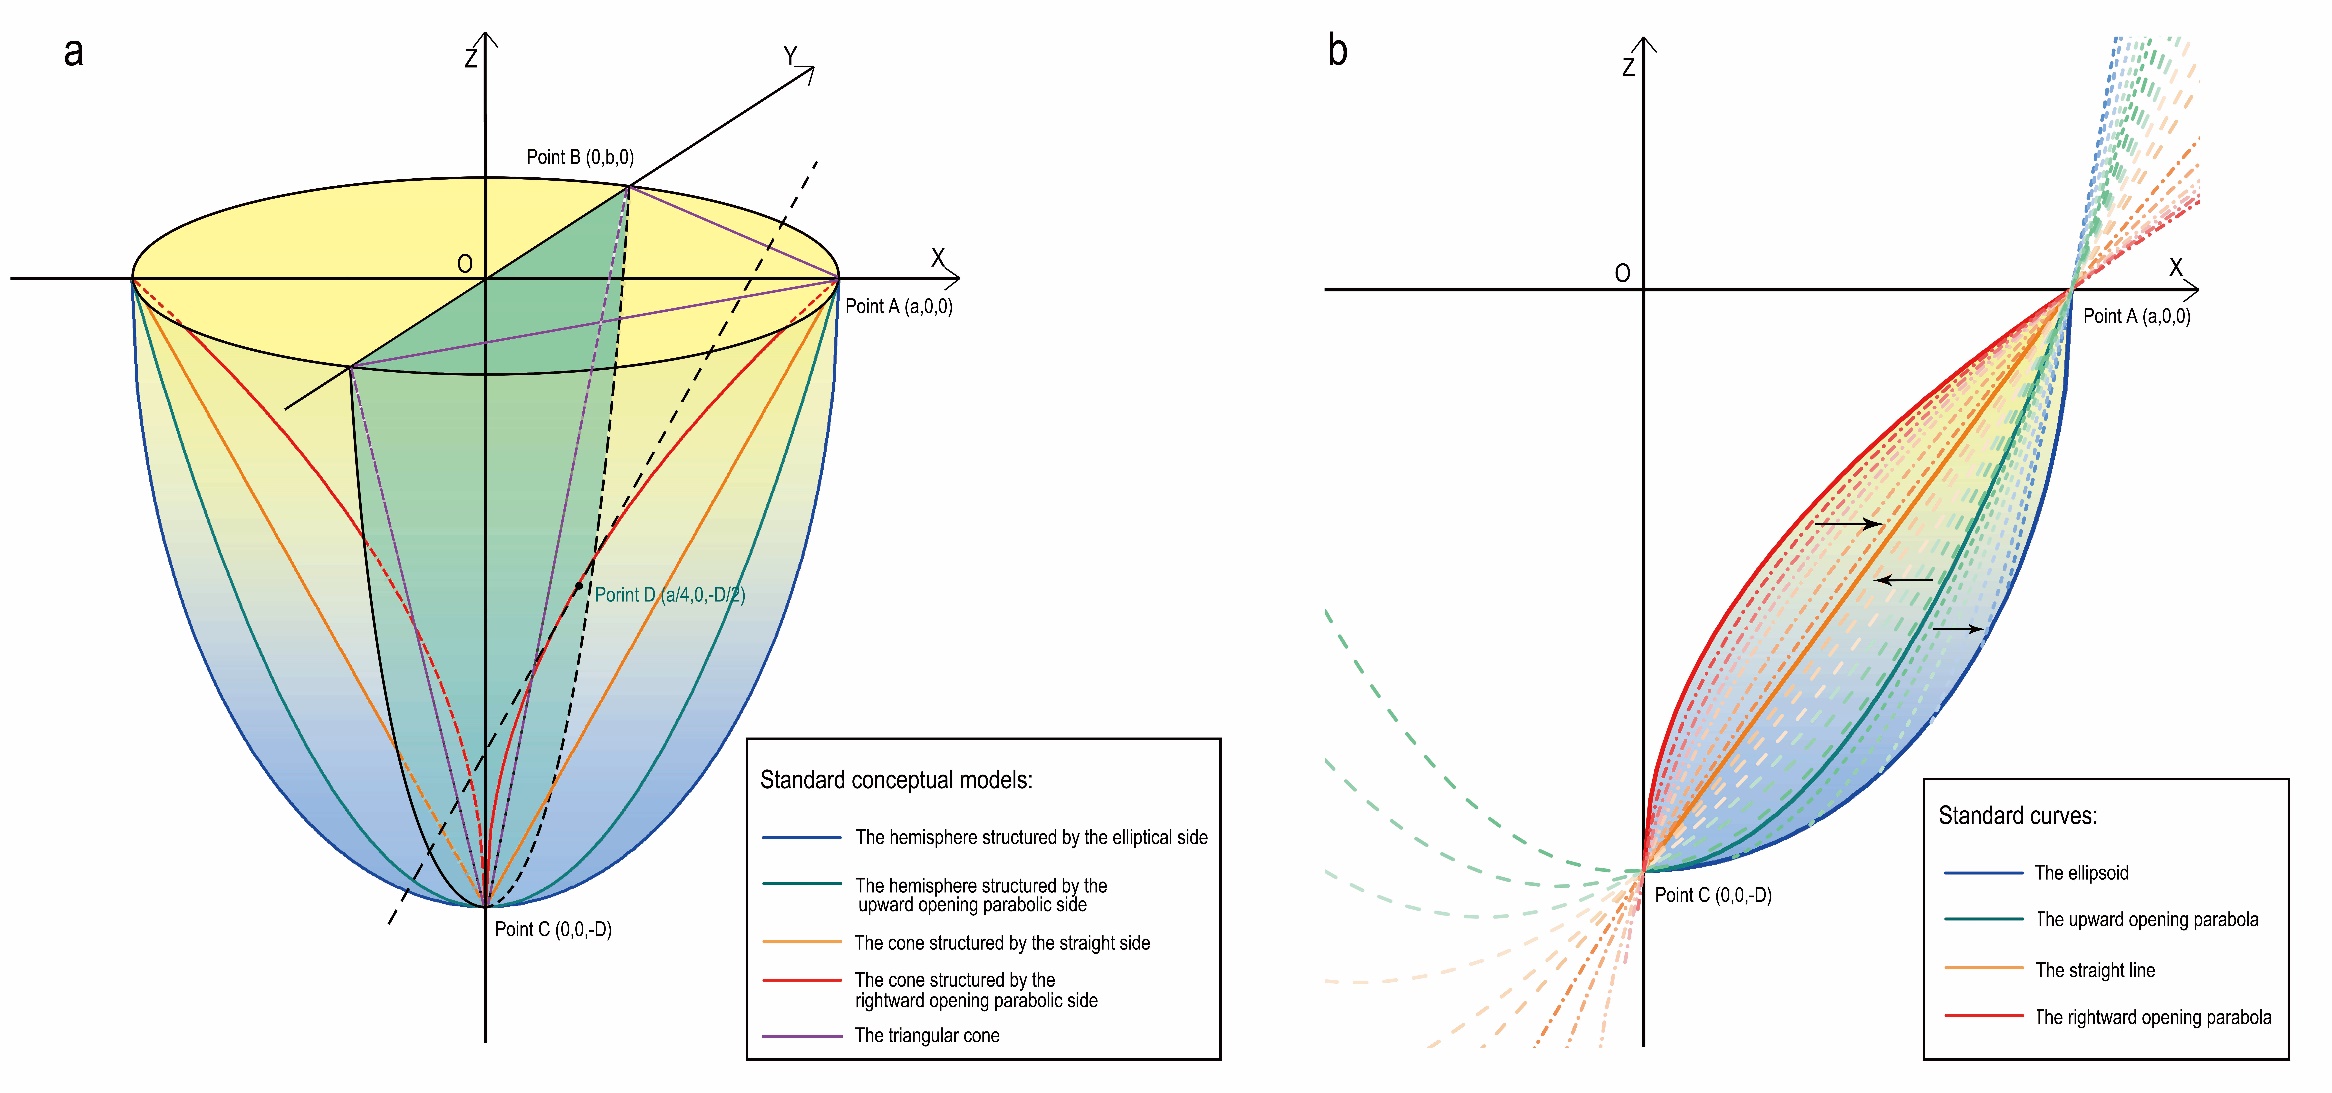


**Figure 1S.** Schematic diagram illustrates the major shapes of the SCMs, namely the semi–ellipsoid, the cone with an upward opening parabolic/a straight/ a rightward opening parabolic side, the triangular cone, as well as their shapes when symmetrically divided which belong to the SCMs of the proglacial lake. Here, a is the semi–long axis and b is the semi-short axis of the elliptical surface, and D is the maximum depth.

**The hemisphere structured by the elliptical side**

Volume equation: (1)

The convergence to the standard elliptic curve from the standard parabola with the opening upward is more complicated, we need to move the vertices of the standard parabola to the right and downward respectively, but then the maximum depth of the body obtained by rotating the general parabola changes, so we employ a compound style here, that is, when the second intersection of the moved general parabolic curve and the standard elliptic curve occurs (from the right to the left), the side of the body starts to take the elliptic curve change.

The parabola is shifted downward by **m** and to the right by **k**. The vertex is located in the X-O-Z quadrant at this point. The corresponding standard equation of the moved parabola:

The curve passes through the point A (a,0,0) and the point C (0,0,-D):

Solved:

Let, after translation, the parabola intersects the standard elliptic curve at the point (xel,-yel). Standard elliptic parametric equation:

The area of the elliptical parcel on the interval [0, xel] is:

(Note: )

Solved:

The area of the elliptical parcel on the interval [xel, a] is:

The volume of the general conceptual model corresponding to this condition is obtained by rotating the parabolic-elliptic parcel region on the X-O-Z quadrant with the area of:

When the m, k→a:

(2)


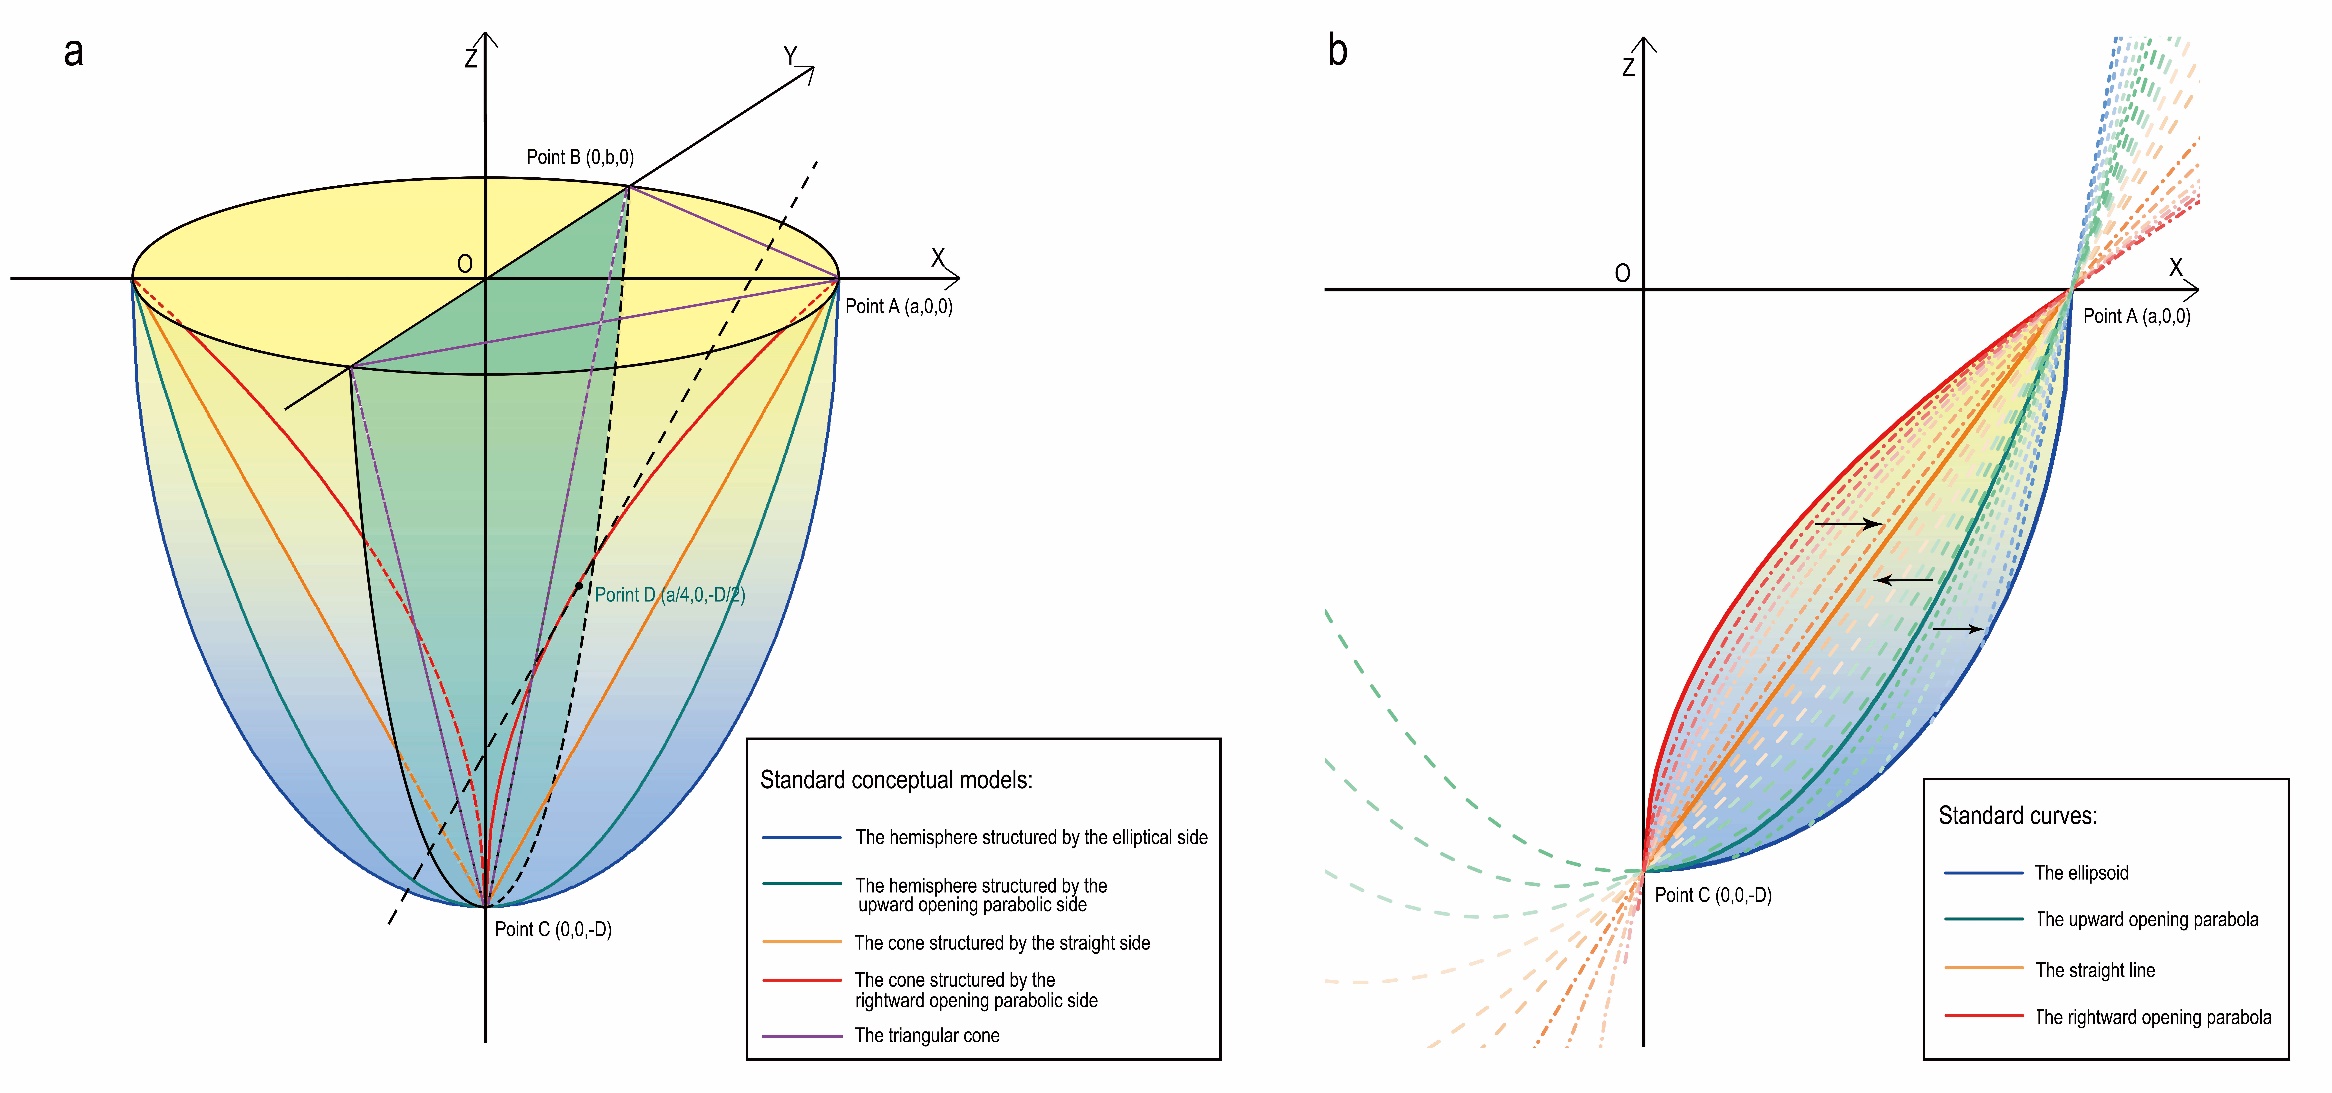


**Figure 2S.** Variations of the standard curves in the X–O–Z quadrant in different directions

**The hemisphere structured by the upward-opening parabolic side**

The transition of a standard upward opening parabola to a straight line. The parabola is shifted downward by **m** and to the left by **k**. The vertex is located in the X-O-Z quadrant at this point. The corresponding standard equation of the moved parabola in the X-O-Z quadrant and Y-O-Z quadrant:

In the X-O-Z quadrant, the parabolic curve passes through the point A (a,0,0) and the point C (0,0,-D), solved:

Similarly:

When the m=0, k=0:

Volume equation: (3)

The volume of the general conceptual model corresponding to this condition is obtained by rotating the parabolic parcel region on the X-O-Z quadrant with the area of:

When the m=0, k=0:

(4)

**The cone structured by the straight side**

Volume equation: (5)

Area equation in the Y-O-Z quadrant: (6)

**The cone structured by the rightward-opening parabolic side**

The transition of a standard rightward opening parabola to a straight line. The parabola is shifted downward by **m** and to the left by **k**. The vertex is located in the X-O-Z quadrant at this point. The corresponding standard equation of the moved parabola in the X-O-Z quadrant and Y-O-Z quadrant:

In the X-O-Z quadrant, the parabolic curve passes through the point A (a,0,0) and the point C (0,0,-D), solved:

Similarly:

When the m=0, k=0:

Volume equation: (7)

The volume of the general conceptual model corresponding to this condition is obtained by rotating the parabolic parcel region on the X-O-Z quadrant with the area of:

When the m=0, k=0:

(8)

**Importantly**, how to calculate the volume of a general conceptual model? When the total volume of the lake is input, how to calculate the corresponding the functional relation of general conceptual model in the X-O-Z and Y-O-Z quadrants? The usual integration method does not seem to work, because there are too many unknown parameters involved and the upper surface is elliptical rather than circular. This results in the value of m not being fixed. Therefore, an iterative approach is used here to approximate the calculation.

An example of the transition from an upward opening parabola to a straight line was exhibited:

By iterating over the values of **m** or **k** to find the that makes Equation 9 hold, the corresponding values of **k** or **m**, , , can be solved. The standard equation of the moved parabola in the X-O-Z quadrant and Y-O-Z quadrant can be displayed:
